# Supplementary material
Source: MDPI journal article supplement (https://www.mdpi.com/2076-3417/12/7/3582)
Supplement: s1 [file s1]

Archive with 2 entries (2 files):
- applsci-1653372-supplementary.pdf
- Movie S1.mp4
